# Supplementary material for: Mid-term outcome of severe tricuspid regurgitation: are there any differences according to mechanism and severity?
Source: Oxford University Press journal article supplement (doi:10.1093/ehjci/jez024), 2019-02-04
Supplement: jez024_supplementary_table.docx [file jez024_supplementary_table.docx]

Supplemental table. Basal echocardiographic parameters according to TR severity.

|  | Overall population | Severe TR | Massive TR | Torrential TR |
| --- | --- | --- | --- | --- |
| RV basal diam. (cm) | 4.38 ± 0.7 | 4.33 ± 0.7 | 4.81 ± 0.7 | 4.89 ± 1.1 |
| TAPSE (cm) | 1.8 ± 0.4 | 1.82 ± 0.4 | 1.67 ± 0.3 | 1.44 ± 0.2 |
| FAC (%) | 36.8 ± 8.6 | 37.3 ± 8.4 | 34.7 ± 9.6 | 22.7 ± 6.5 |
| Vena contr. (mm) | 10.3± 3.0 | 9.5 ± 2.0 | 15.5 ± 1.8 | 25.2 ± 3.8 |
| PASP (mmHg) | 54.2 ±16.6 | 54.6 ± 17.0 | 51.7 ± 12.3 | 49.5 ± 19.8 |
| LV EF Bipl. (%) | 53.46 ± 11.1 | 54.2 ± 10.6 | 49.7 ± 13.5 | 39.5 ± 21.5 |
| LAVi (ml/m2) | 56.4 ± 32.8 | 56.5 ± 34.0 | 58.3 ± 27.8 | 59.7 ± 23.0 |
| E/e’ ratio | 14.6 ± 8.4 | 14.1 ± 8.4 | 17.2 ± 12.0 | 12.0 ± 1.7 |

RV: right ventricle; TAPSE: tricuspid annular plane systolic excursion; FAC: fractional area change; LAVi: Left atrial volume index; PASP: pulmonary artery systolic pressure; LV: left ventricle; EF: ejection fraction.
